# Supplementary material for: Tunable orange-deep red photoluminescence in amorphous KZn 1− x Mn x (PO 3 ) 3 phosphors and anti-counterfeiting applications
Source: Royal Society of Chemistry journal article supplement (doi:10.1039/d5dt00007f), 2025-01-01
Supplement: d5dt00007f1.pdf [file d5dt00007f1.pdf]

## Supplementary Information

### **Tunable orange-deep red photoluminescence in amorphous $\text{KZn}_{1-x}\text{Mn}_x(\text{PO}_3)_3$ phosphors and anti-counterfeiting applications**

Jiayue Jiang,<sup>a,c</sup> Hao Wang,<sup>b</sup> Tingting Zhao,<sup>b</sup> Yixuan Xu,<sup>a</sup> Junlong Li,<sup>a,b,c</sup> Hu Cheng,<sup>a</sup> Fei Zhang,<sup>a</sup> Dongliang Yang,<sup>a</sup> Yu Gong,<sup>a</sup> Chuanlong Lin,<sup>\*b</sup> Xiaodong Li <sup>\*a</sup> and Yanchun Li <sup>\*a</sup>

*<sup>a</sup>Multi-disciplinary Research Division of Institute of High Energy Physics, Chinese Academy of Sciences, Beijing 100049, P.R. China.*

*<sup>b</sup>Center for High Pressure Science and Technology Advanced Research (HPSTAR), Beijing 100193, P.R. China.*

*<sup>c</sup>University of Chinese Academy of Sciences, Beijing 100049, P.R. China.*

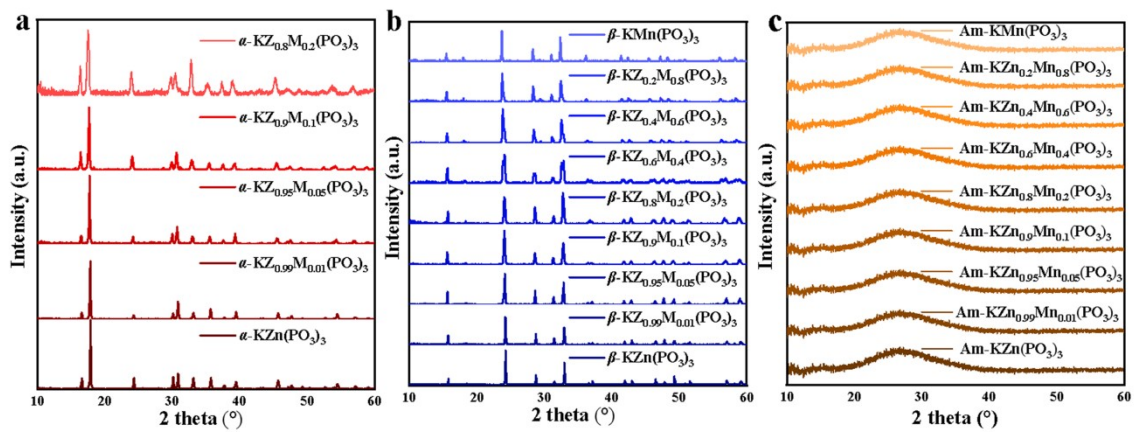

**Fig. S1.** The XRD patterns of a)  $\alpha$ -KZn<sub>1-x</sub>Mn<sub>x</sub>(PO<sub>3</sub>)<sub>3</sub> phosphor, b)  $\beta$ -KZn<sub>1-x</sub>Mn<sub>x</sub>(PO<sub>3</sub>)<sub>3</sub> phosphor, and c) Am-KZn<sub>1-x</sub>Mn<sub>x</sub>(PO<sub>3</sub>)<sub>3</sub> phosphor.

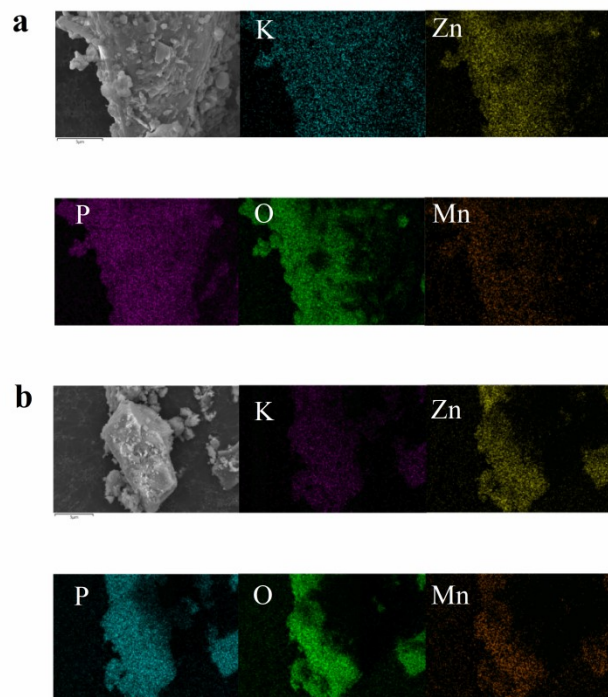

**Fig. S2.** SEM images, and 2D element mapping of a)  $\alpha$ - $\text{KZn}_{0.8}\text{Mn}_{0.2}(\text{PO}_3)_3$  phosphor and b)  $\beta$ - $\text{KZn}_{0.8}\text{Mn}_{0.2}(\text{PO}_3)_3$  phosphor.

**Table. S1.** The individual lifetime components ( $\tau_1$ ,  $\tau_2$ ) and their relative amplitudes ( $A_1$ ,  $A_2$ ) at  $\text{KZn}_{0.8}\text{Mn}_{0.2}(\text{PO}_3)_3$  phosphor with different phases.

| Materials                                                   | $A_1$   | $\tau_1(\text{ms})$ | $A_2$   | $\tau_2(\text{ms})$ | $\tau_{\text{ave}}$ | $R^2$   |
|-------------------------------------------------------------|---------|---------------------|---------|---------------------|---------------------|---------|
| $\alpha$ - $\text{KZn}_{0.8}\text{Mn}_{0.2}(\text{PO}_3)_3$ | 0.43025 | 3.08456             | 0.33267 | 24.15623            | 21.16954            | 0.9693  |
| $\beta$ - $\text{KZn}_{0.8}\text{Mn}_{0.2}(\text{PO}_3)_3$  | 0.35486 | 7.76794             | 0.5912  | 26.32281            | 23.53072            | 0.99196 |
| Am-<br>$\text{KZn}_{0.8}\text{Mn}_{0.2}(\text{PO}_3)_3$     | 0.40992 | 2.96749             | 0.53371 | 18.56466            | 16.85916            | 0.98716 |

**Table. S2.** The individual lifetime components and their relative amplitudes at  $\text{KZn}_{0.99}\text{Mn}_{0.01}(\text{PO}_3)_3$  phosphor with different phases.

| Materials                                                     | $A_1$   | $\tau_1(\text{ms})$ | $A_2$   | $\tau_2(\text{ms})$ | $\tau_{\text{ave}}$ | $R^2$   |
|---------------------------------------------------------------|---------|---------------------|---------|---------------------|---------------------|---------|
| $\alpha$ - $\text{KZn}_{0.99}\text{Mn}_{0.01}(\text{PO}_3)_3$ | 0.68972 | 0.04177             | -       | -                   | -                   | 0.96125 |
| $\beta$ - $\text{KZn}_{0.99}\text{Mn}_{0.01}(\text{PO}_3)_3$  | 0.42285 | 0.02348             | -       | -                   | -                   | 0.95731 |
| Am-<br>$\text{KZn}_{0.99}\text{Mn}_{0.01}(\text{PO}_3)_3$     | 0.25061 | 0.00764             | 0.51181 | 0.02447             | 0.02223             | 0.96913 |

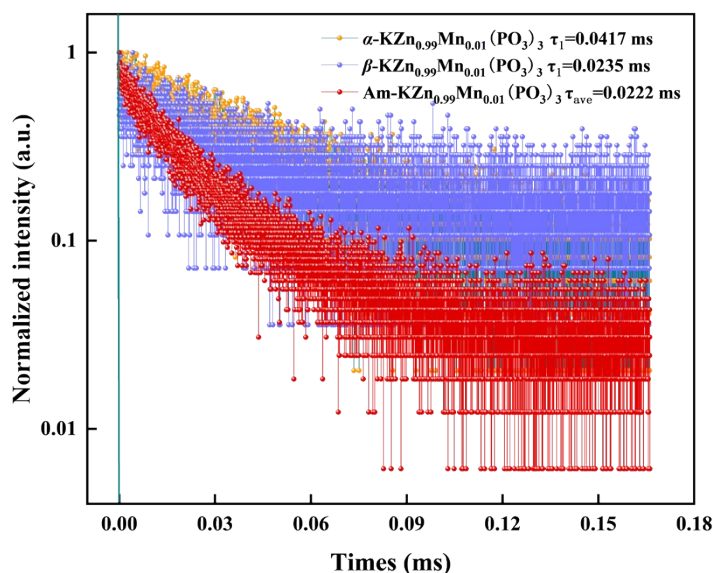

**Fig. S3.** The decay curves of  $\text{KZn}_{0.99}\text{Mn}_{0.01}(\text{PO}_3)_3$  phosphor for different phases.

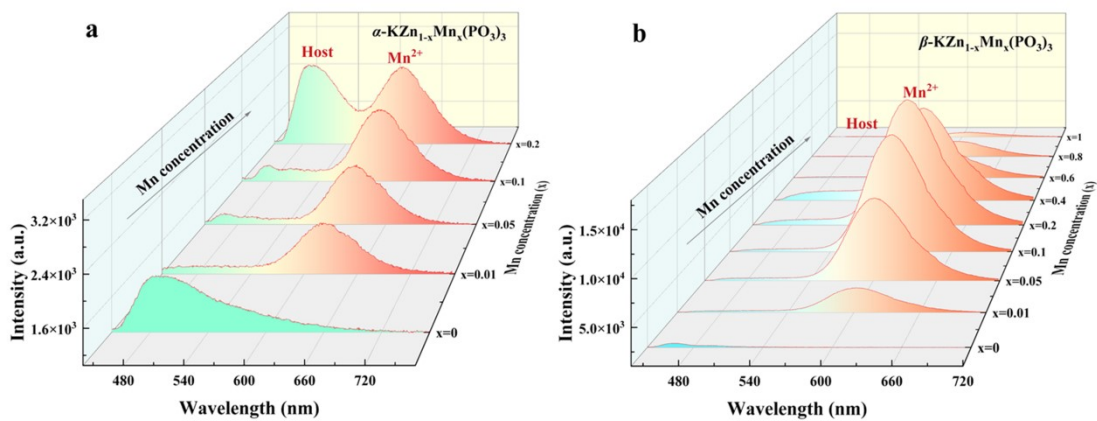

**Fig. S4.** The 3D PL spectra of a)  $\alpha$ -KZn<sub>1-x</sub>Mn<sub>x</sub>(PO<sub>3</sub>)<sub>3</sub> phosphor and b)  $\beta$ -KZn<sub>1-x</sub>Mn<sub>x</sub>(PO<sub>3</sub>)<sub>3</sub> phosphor.

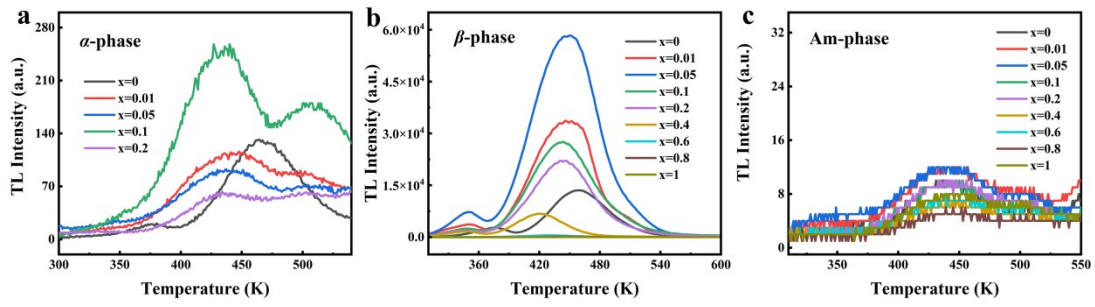

**Fig. S5.** The TL curves of a)  $\alpha$ - $\text{KZn}_{1-x}\text{Mn}_x(\text{PO}_3)_3$  phosphor, b)  $\beta$ - $\text{KZn}_{1-x}\text{Mn}_x(\text{PO}_3)_3$  phosphor, and c) Am- $\text{KZn}_{1-x}\text{Mn}_x(\text{PO}_3)_3$  phosphor at heating rates of  $1 \text{ K s}^{-1}$ .

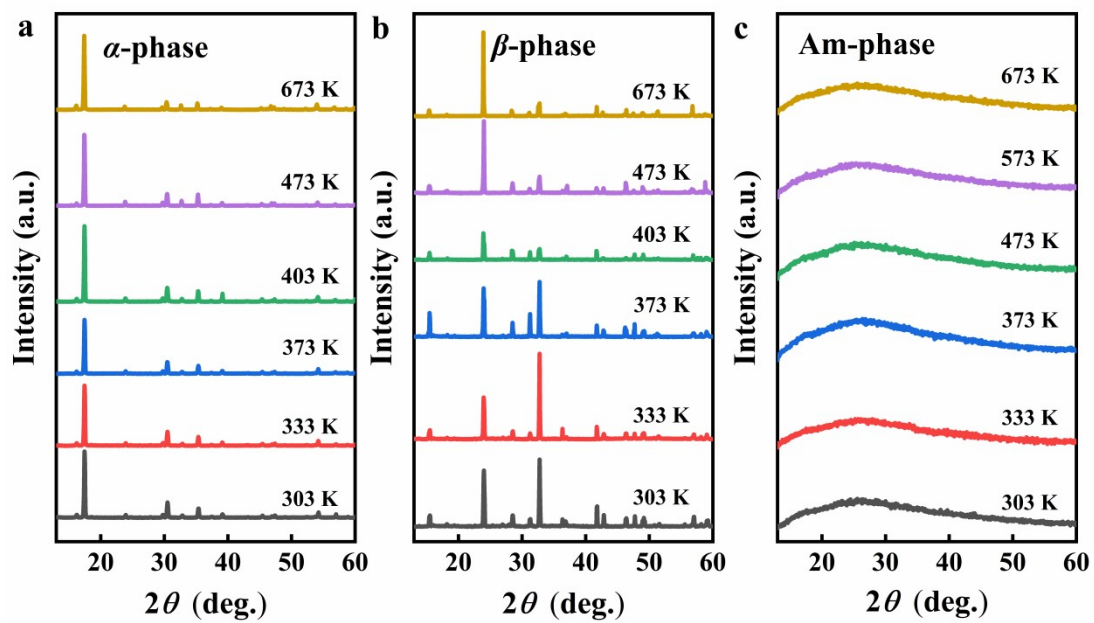

**Fig. S6.** The temperature-dependent XRD patterns of a)  $\alpha$ -KZn<sub>0.95</sub>Mn<sub>0.05</sub>(PO<sub>3</sub>)<sub>3</sub> phosphor, b)  $\beta$ -KZn<sub>0.95</sub>Mn<sub>0.05</sub>(PO<sub>3</sub>)<sub>3</sub> phosphor, and c) Am-KZn<sub>0.95</sub>Mn<sub>0.05</sub>(PO<sub>3</sub>)<sub>3</sub> phosphor.

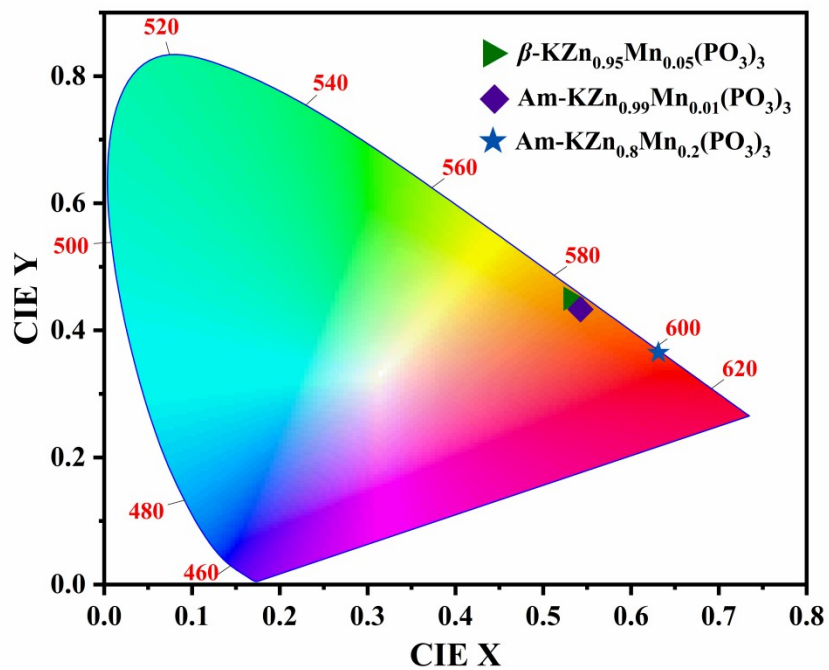

Fig. S7. The CIE chromaticity coordinates of  $\beta$ -KZn<sub>0.95</sub>Mn<sub>0.05</sub>(PO<sub>3</sub>)<sub>3</sub>, Am-KZn<sub>0.99</sub>Mn<sub>0.01</sub>(PO<sub>3</sub>)<sub>3</sub>, and Am-KZn<sub>0.8</sub>Mn<sub>0.2</sub>(PO<sub>3</sub>)<sub>3</sub> phosphors.
